# Supplementary material for: Reconsidering high intensity zones: its role in intervertebral disk degeneration and low back pain
Source: Springer Nature journal article supplement (doi:10.1007/s00586-024-08185-x), 2024-02-21
Supplement: MOESM1 [file 26759774]

# **Reconsidering High Intensity Zones: Its Role in Intervertebral Disk Degeneration and Low Back Pain**

**Journal:** European Spine Journal

**Authors:** Stone Sima, Xiaolong Chen\*, Kyle Sheldrick, Jeff Kuan, Ashish D. Diwan

**\*Corresponding author:** Xiaolong Chen

Spine Labs, St George and Sutherland Clinical School, University of New South Wales, New  
South Wales, Australia

Email Address: [xiaolong.chen1@unsw.edu.au](mailto:xiaolong.chen1@unsw.edu.au)

## Electronic Supplementary Material 1

### Simulation demonstrating the effect of classification error in pain status.

This is a simulation of 5000 studies of 400 patients with a 50% chance of having pain (with a 60% chance of HIZ) and 50% chance of having no pain (with a 30% chance of HIZ), for a true underlying OR of 3.5. (Recall that OR will be substantially larger than RR for non-rare outcomes).

If we simulate patients with pain having a 20% chance of being misclassified as no pain (and vice versa) we can see there is a substantial bias towards the null, with the observed ORs centring on  $\sim 2.1$  instead of the correct  $\sim 3.5$  which is what was observed with no classification error.

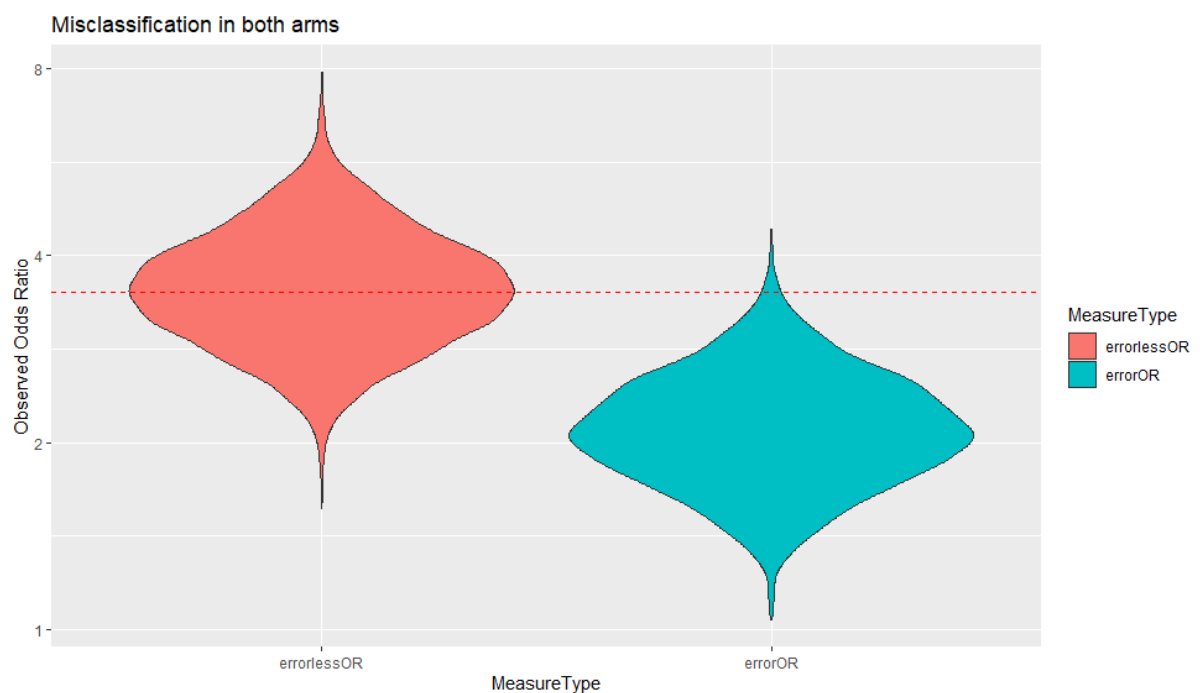

Likewise, if we simulate such a classification error only in patients who genuinely have pain (i.e. false negatives but no false positives), we again see a substantial but smaller bias towards the null with the observed ORs centring on  $\sim 2.8$  instead of the correct  $\sim 3.5$  seen with no classification error.

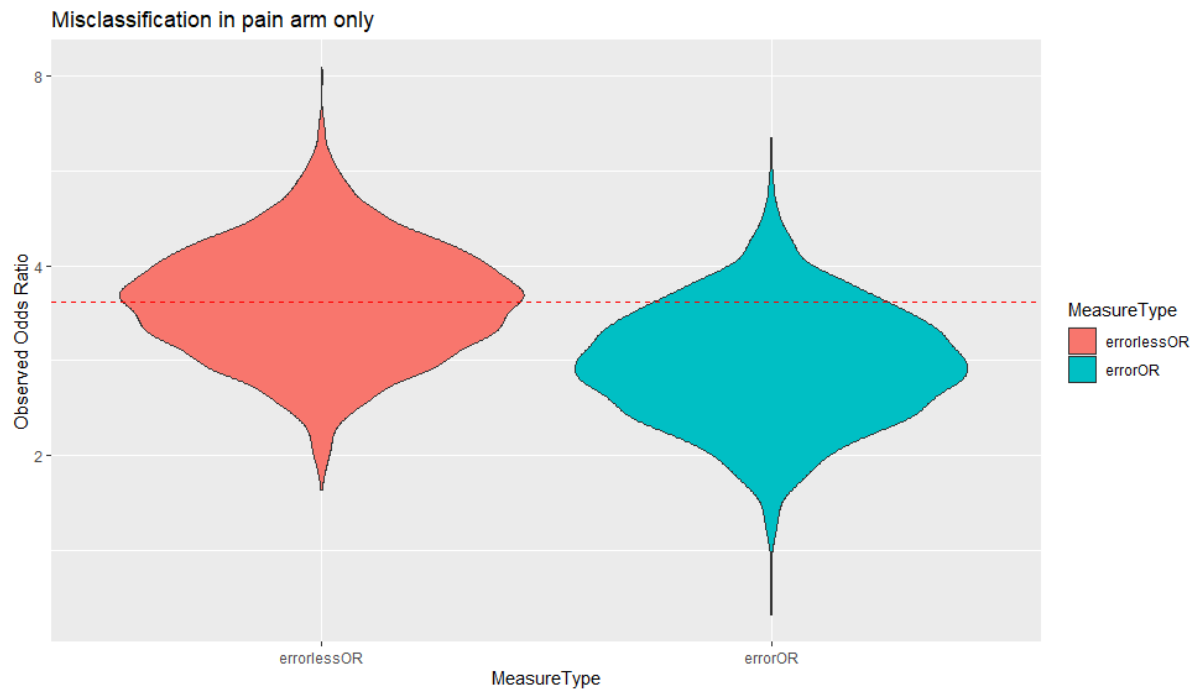

Finally if the null hypothesis is true, classification error does not bias the results towards an effect (in either direction).

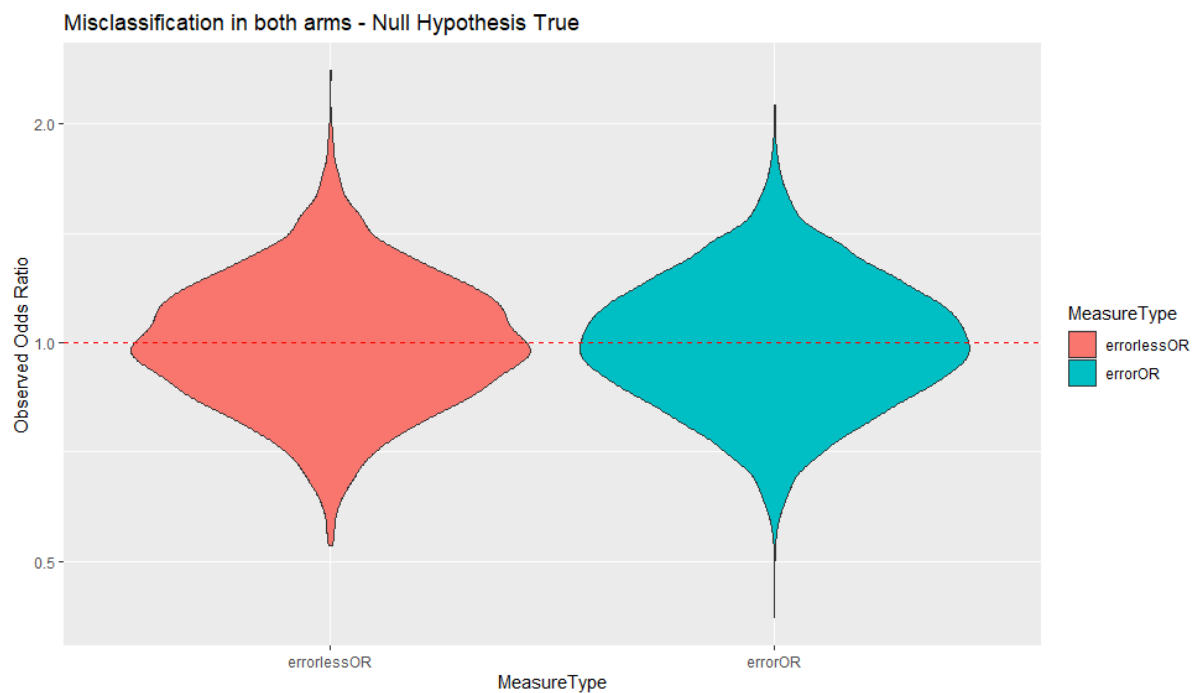

In short: any classification error would only result in a weakening of the observed association, not a spurious association. That is the underlying association is likely stronger than what we are reporting, and we have added a sentence to the discussion drawing this to the attention of readers.

The R code for the simulation study demonstrating the effect of classification error in pain status is written below:

### *Misclassification of Pain Code*

```
#step 0, load the packages
```

```
library(car)
library(epitools)
library(ggplot2)
library(tidyr)
library(dplyr)
```

```
#Step 1, Set seed makes the RNG start at the same place
set.seed(1)
```

```
#Step 2, decide how many times to run
loops <- 5000
```

```
#Step 3, decide how many patients
nPatients <- 400
```

```
# Step 4, make a vector for every outcome you want to save from the
study
errorlessOR = numeric(loops)
errorOR = numeric(loops)
```

```
#step 5 start a "for" loop, everything in this will be repeated
"loops" times
for (i in 1:loops) {
```

```
  #Step 6, simulate the measured pain status, and presence of HIZ
  for each patient
```

```
    pid=seq(1, by=1, len=nPatients) #create consecutive pids
    truepain=rbinom(nPatients, 1, 0.5) # this randomly assigns each
    patient to have or not have pain with a 1:1 ratio regardless of
    what came before or after
    measuredpain = numeric(nPatients)
    HIZ = numeric(nPatients)
```

```
    for (j in 1:nPatients){
      if(truepain[j]==0){
        measuredpain[j] = rbinom(1, 1, 0.2) #this introduces a 20%
        error rate in pain classification, change to zero for no error in
        this group
```

```

    HIZ [j] = rbinom(1, 1, 0.3) #allocates HIZ with a 30% chance
in pain free participants
  }

  if(truepain[j]==1){
    measuredpain[j] = rbinom(1, 1, 0.8) #this introduces a 20%
error rate in pain classification
    HIZ [j] = rbinom(1, 1, 0.6) #allocates HIZ with a 60% chance
in participants with pain
  }

}

noerror = oddsratio(table(truepain,HIZ))
witherror = oddsratio(table(measuredpain,HIZ))

errorlessOR[i] = noerror$measure[2]
errorOR[i] = witherror$measure[2]

}

data = data.frame(errorlessOR,errorOR)
datalong = gather(data, key="MeasureType", value="Val")
ggplot(datalong, aes(x=MeasureType, y=Val, fill=MeasureType)) +
  geom_violin() +
  geom_hline(yintercept=3.5, linetype="dashed", color = "red") +
  scale_y_continuous(trans='log2')+
  ggtitle("Misclassification in both arms")+
  ylab("Observed Odds Ratio")

quantile(errorlessOR)
quantile(errorOR)

```

### *If Null Hypothesis is True Code*

```
#step 0, load the packages
```

```
library(car)
library(epitools)
library(ggplot2)
library(tidyr)
library(dplyr)
```

```
#Step 1, Set seed makes the RNG start at the same place
set.seed(1)
```

```
#Step 2, decide how many times to run
loops <- 5000
```

```
#Step 3, decide how many patients
nPatients <- 400
```

```
# Step 4, make a vector for every outcome you want to save from the
study
errorlessOR = numeric(loops)
errorOR = numeric(loops)
```

```
#step 5 start a "for" loop, everything in this will be repeated
"loops" times
for (i in 1:loops) {
```

```
  #Step 6, simulate the measured pain status, and presence of HIZ
  for each patient
```

```
    pid=seq(1, by=1, len=nPatients) #create consecutive pids
    truepain=rbinom(nPatients, 1, 0.5) # this randomly assigns each
    patient to have or not have pain with a 1:1 ratio regardless of
    what came before or after
    measuredpain = numeric(nPatients)
    HIZ = numeric(nPatients)
```

```
    for (j in 1:nPatients){
      if(truepain[j]==0){
        measuredpain[j] = rbinom(1, 1, 0.2) #this introduces a 20%
        error rate in pain classification, change to 0 for no error in this
        group
        HIZ [j] = rbinom(1, 1, 0.5) #allocates HIZ with a 30% chance
        in pain free participants
      }
    }
  }
}
```

```

    if(truepain[j]==1){
      measuredpain[j] = rbinom(1, 1, 0.8) #this introduces a 20%
error rate in pain classification
      HIZ [j] = rbinom(1, 1, 0.5) #allocates HIZ with a 60% chance
in participants with pain
    }

  }

  noerror = oddsratio(table(truepain,HIZ))
  witherror = oddsratio(table(measuredpain,HIZ))

  errorlessOR[i] = noerror$measure[2]
  errorOR[i] = witherror$measure[2]

}

data = data.frame(errorlessOR,errorOR)
datalong = gather(data, key="MeasureType", value="Val")
ggplot(datalong, aes(x=MeasureType, y=Val, fill=MeasureType)) +
  geom_violin() +
  geom_hline(yintercept=1, linetype="dashed", color = "red") +
  scale_y_continuous(trans='log2')+
  ggtitle("Misclassification in both arms - Null Hypothesis True")+
  ylab("Observed Odds Ratio")

quantile(errorlessOR)
quantile(errorOR)

```
